# Supplementary material for: Thermodynamic properties (S298, Cp(T), internal rotations and group additivity parameters) in vinyl and phenyl hydroperoxidesElectronic supplementary information (ESI) available: Internal rotation barriers, Fourier expansion coefficients for internal rotation potentials for vinyl and phenyl hydroperoxides. See http://www.rsc.org/suppdata/cp/b2/b207030h/
Source: Royal Society of Chemistry journal article supplement (doi:10.1039/b207030h), 2002-11-29
Supplement: tables.pdf [file tables.pdf]

Article Ref. B207030H

## Supplementary data

**Thermodynamic Properties ( $S(298)$ ,  $C_p(T)$ , Internal Rotations  
and Group Additivity Parameters in Vinyl and Phenyl Hydroperoxides**

**Nadia Sebbar<sup>a</sup> and Henning Bockhorn<sup>\*a</sup>**

*<sup>a</sup>Universität Karlsruhe (TH), Institut für Chemische Technik, Karlsruhe; Kaiserstrasse 12,  
76128 Karlsruhe; Germany*

*Corresponding author:*

*Phone: + 49-721-608 2120      Fax: + 49-721-608 4820*

*E-mail: bockhorn@ict.uni-karlsruhe.de*

**and**

**Joseph W. Bozzelli<sup>\*b</sup>**

*<sup>b</sup>Department of Chemical Engineering, Chemistry and Environmental Science,  
New Jersey Institute of Technology, Newark NJ 07102 USA*

*Phone: + 973-596 3459      Fax: + 973-596 3586*

*E-mail: bozzelli@njit.edu*

**SM 1: Total Energy and Internal Rotation Barriers about C—O Bond of Unsaturated Hydroperoxides**

| <i>trans</i> - CH <sub>3</sub> CH=CH—OOH |                           |                                 | <i>cis</i> - CH <sub>3</sub> CH=CH—OOH |                           |                                 |
|------------------------------------------|---------------------------|---------------------------------|----------------------------------------|---------------------------|---------------------------------|
| Torsion Angle                            | Total energy <sup>a</sup> | Rotational barrier <sup>b</sup> | Torsion Angle                          | Total energy <sup>a</sup> | Rotational barrier <sup>b</sup> |
| 0.0                                      | -268.262306948            | 0.00                            | 0.0                                    | -268.257694902            | 2.65                            |
| 15.0                                     | -268.261819566            | 0.30                            | 15.0                                   | -268.257431774            | 2.82                            |
| 30.0                                     | -268.260166345            | 1.34                            | 30.0                                   | -268.256777160            | 3.23                            |
| 45.0                                     | -268.257915018            | 2.75                            | 45.0                                   | -268.256080902            | 3.66                            |
| 60.0                                     | -268.256037511            | 3.93                            | 60.0                                   | -268.256113836            | 3.64                            |
| 75.0                                     | -268.255396438            | 4.33                            | 75.0                                   | -268.256537585            | 3.38                            |
| 90.0                                     | -268.256442326            | 3.68                            | 90.0                                   | -268.257720267            | 2.64                            |
| 105.0                                    | -268.258586159            | 2.33                            | 105.0                                  | -268.259418555            | 1.57                            |
| 120.0                                    | -268.260477818            | 1.14                            | 120.0                                  | -268.260998677            | 0.58                            |
| 135.0                                    | -268.261466572            | 0.52                            | 135.0                                  | -268.261926886            | 0.00                            |
| 150.0                                    | -268.261422849            | 0.55                            | 150.0                                  | -268.261871280            | 0.03                            |
| 165.0                                    | -268.260713219            | 1.00                            | 165.0                                  | -268.261091754            | 0.52                            |
| 180.0                                    | -268.260224275            | 1.30                            | 180.0                                  | -268.260575194            | 0.84                            |
| 195.0                                    | -268.260696729            | 1.01                            | 195.0                                  | -268.261037536            | 0.55                            |
| 210.0                                    | -268.261557167            | 0.47                            | 210.0                                  | -268.261600642            | 0.20                            |
| 225.0                                    | -268.261730279            | 0.36                            | 225.0                                  | -268.261428905            | 0.31                            |
| 240.0                                    | -268.260865027            | 0.90                            | 240.0                                  | -268.260232849            | 1.06                            |
| 255.0                                    | -268.259186263            | 1.95                            | 255.0                                  | -268.258265992            | 2.29                            |
| 270.0                                    | -268.257298405            | 3.14                            | 270.0                                  | -268.256235287            | 3.57                            |
| 285.0                                    | -268.255926609            | 4.00                            | 285.0                                  | -268.256537745            | 3.38                            |
| 300.0                                    | -268.255857804            | 4.04                            | 300.0                                  | -268.256117615            | 3.64                            |
| 315.0                                    | -268.257311979            | 3.13                            | 315.0                                  | -268.256272230            | 3.54                            |
| 330.0                                    | -268.259555492            | 1.72                            | 330.0                                  | -268.256824936            | 3.20                            |
| 345.0                                    | -268.261475349            | 0.52                            | 345.0                                  | -268.257447004            | 2.81                            |
| 360.0                                    | -268.262307145            | 0.00                            | 360.0                                  | -268.257685515            | 2.66                            |

<sup>a</sup>Electronic energies at 0 K. ZPVE and Thermal correction to 298 K are not included. Unit are in hartree. <sup>b</sup>Rotational barriers are calculated as the difference between the total energy of each conformer and that of the most stable conformer. Units in kcal/mole.

**SM 1 (cont): Total Energy and Internal Rotation Barriers about C—O Bond of Unsaturated Hydroperoxides**

| (CH <sub>3</sub> ) <sub>2</sub> C=CH—OOH |                        |                           |               | CH <sub>3</sub> CH=C(CH <sub>3</sub> )—OOH |                        |                           |
|------------------------------------------|------------------------|---------------------------|---------------|--------------------------------------------|------------------------|---------------------------|
| Torsion Angle                            | Relative Torsion Angle | Total energy <sup>a</sup> | Torsion Angle | Torsion Angle                              | Relative Torsion Angle | Total energy <sup>a</sup> |
| -133.92                                  | 0.0                    | -307.583985380            | 0.00          | -55.63                                     | -307.582469772         | 2.11                      |
| -118.92                                  | 15.0                   | -307.583493612            | 0.30          | -40.63                                     | -307.583143652         | 1.69                      |
| -103.92                                  | 30.0                   | -307.582261666            | 1.08          | -25.63                                     | -307.584427132         | 0.88                      |
| -88.924                                  | 45.0                   | -307.580809812            | 1.99          | -10.63                                     | -307.585410633         | 0.27                      |
| -73.924                                  | 60.0                   | -307.579527139            | 2.79          | 4.3711                                     | -307.585453330         | 0.24                      |
| -58.924                                  | 75.0                   | -307.578507527            | 3.43          | 19.371                                     | -307.584222720         | 1.01                      |
| -43.924                                  | 90.0                   | -307.577651210            | 3.97          | 34.371                                     | -307.582171666         | 2.30                      |
| -28.924                                  | 105.0                  | -307.577165695            | 4.28          | 49.371                                     | -307.580678094         | 3.24                      |
| -13.924                                  | 120.0                  | -307.577106785            | 4.31          | 64.371                                     | -307.580352750         | 3.44                      |
| 1.0763                                   | 135.0                  | -307.577032431            | 4.36          | 79.371                                     | -307.580372256         | 3.43                      |
| 16.076                                   | 150.0                  | -307.576968741            | 4.40          | 94.371                                     | -307.580536718         | 3.33                      |
| 31.076                                   | 165.0                  | -307.576978033            | 4.39          | 109.37                                     | -307.580693945         | 3.23                      |
| 46.076                                   | 180.0                  | -307.577307182            | 4.19          | 124.37                                     | -307.580902927         | 3.09                      |
| 61.076                                   | 195.0                  | -307.578023806            | 3.74          | 139.37                                     | -307.580864738         | 3.12                      |
| 76.076                                   | 210.0                  | -307.579692259            | 2.69          | 154.37                                     | -307.580639407         | 3.26                      |
| 91.076                                   | 225.0                  | -307.581017351            | 1.86          | 169.37                                     | -307.580441060         | 3.39                      |
| 106.08                                   | 240.0                  | -307.582464017            | 0.95          | 184.37                                     | -307.580565388         | 3.31                      |
| 121.08                                   | 255.0                  | -307.583621259            | 0.22          | 199.37                                     | -307.581321238         | 2.83                      |
| 136.08                                   | 270.0                  | -307.583974306            | 0.00          | 214.37                                     | -307.582917793         | 1.83                      |
| 151.08                                   | 285.0                  | -307.583333642            | 0.40          | 229.37                                     | -307.584775124         | 0.67                      |
| 166.08                                   | 300.0                  | -307.582115786            | 1.17          | 244.37                                     | -307.585842298         | 0.00                      |
| 181.08                                   | 315.0                  | -307.581541900            | 1.53          | 259.37                                     | -307.585668844         | 0.10                      |
| 181.08                                   | 330.0                  | -307.581531792            | 1.53          | 274.37                                     | -307.584547499         | 0.81                      |
| 196.08                                   | 345.0                  | -307.582287507            | 1.06          | 289.37                                     | -307.583166432         | 1.68                      |
| 211.08                                   | 360.0                  | -307.583479035            | 0.31          | 304.37                                     | -307.582469829         | 2.11                      |

<sup>a</sup>Electronic energies at 0 K. ZPVE and Thermal correction to 298 K are not included. Unit are in hartree. <sup>b</sup>Rotational barriers are calculated as the difference between the total energy of each conformer and that of the most stable conformer. Units in kcal/mole.

**SM 2: Total Energy and Internal Rotation Barriers about O—O Bond of Unsaturated Hydroperoxides**

| <i>trans</i> - CH <sub>3</sub> CH=CHO—OH |                           |                                 | <i>cis</i> - CH <sub>3</sub> CH=CHO—OH |                           |                                 |
|------------------------------------------|---------------------------|---------------------------------|----------------------------------------|---------------------------|---------------------------------|
| Torsion Angle                            | Total energy <sup>a</sup> | Rotational Barrier <sup>b</sup> | Torsion Angle                          | Total energy <sup>a</sup> | Rotational Barrier <sup>b</sup> |
| 0.0                                      | -268.252958229            | 5.53                            | 0.0                                    | -268.253396912            | 5.40                            |
| 15.0                                     | -268.254081788            | 4.82                            | 15.0                                   | -268.254465429            | 4.73                            |
| 30.0                                     | -268.255965419            | 3.64                            | 30.0                                   | -268.256259157            | 3.60                            |
| 45.0                                     | -268.258073894            | 2.32                            | 45.0                                   | -268.258275181            | 2.34                            |
| 60.0                                     | -268.259876096            | 1.19                            | 60.0                                   | -268.260004486            | 1.25                            |
| 75.0                                     | -268.261049105            | 0.45                            | 75.0                                   | -268.261140967            | 0.54                            |
| 90.0                                     | -268.261537587            | 0.14                            | 90.0                                   | -268.261621537            | 0.24                            |
| 105.0                                    | -268.261468419            | 0.19                            | 105.0                                  | -268.261567410            | 0.27                            |
| 120.0                                    | -268.261105943            | 0.41                            | 120.0                                  | -268.261208323            | 0.50                            |
| 135.0                                    | -268.260680012            | 0.68                            | 135.0                                  | -268.260800556            | 0.75                            |
| 150.0                                    | -268.260412584            | 0.85                            | 150.0                                  | -268.260554752            | 0.91                            |
| 165.0                                    | -268.260419710            | 0.84                            | 165.0                                  | -268.260583283            | 0.89                            |
| 180.0                                    | -268.260690906            | 0.67                            | 180.0                                  | -268.260874442            | 0.71                            |
| 195.0                                    | -268.261118014            | 0.41                            | 195.0                                  | -268.261320215            | 0.43                            |
| 210.0                                    | -268.261533243            | 0.15                            | 210.0                                  | -268.261753918            | 0.15                            |
| 225.0                                    | -268.261771100            | 0.00                            | 225.0                                  | -268.262006698            | 0.00                            |
| 240.0                                    | -268.261691965            | 0.05                            | 240.0                                  | -268.261940992            | 0.04                            |
| 255.0                                    | -268.261186524            | 0.36                            | 255.0                                  | -268.261459254            | 0.34                            |
| 270.0                                    | -268.260211149            | 0.97                            | 270.0                                  | -268.260507980            | 0.94                            |
| 285.0                                    | -268.258792543            | 1.8                             | 285.0                                  | -268.259118233            | 1.81                            |
| 300.0                                    | -268.257058954            | 2.95                            | 300.0                                  | -268.257424889            | 2.87                            |
| 315.0                                    | -268.255255909            | 4.08                            | 315.0                                  | -268.255666996            | 3.97                            |
| 330.0                                    | -268.253727830            | 5.04                            | 330.0                                  | -268.254174020            | 4.91                            |
| 345.0                                    | -268.252858760            | 5.59                            | 345.0                                  | -268.253319652            | 5.45                            |
| 360.0                                    | -268.252958302            | 5.53                            | 360.0                                  | -268.253396915            | 5.40                            |

<sup>a</sup>Electronic energies at 0 K. ZPVE and Thermal correction to 298 K are not included. Unit are in hartree. <sup>b</sup>Rotational barriers are calculated as the difference between the total energy of each conformer and that of the most stable conformer. Units in kcal/mole.

**SM 2 (cont): Total Energy and Internal Rotation Barriers about O—O Bond of Unsaturated Hydroperoxides**

| (CH <sub>3</sub> ) <sub>2</sub> C=CHO—OH |                        |                           |                                 | CH <sub>3</sub> CH=C(CH <sub>3</sub> )O—OH |                        |                           |                                 |
|------------------------------------------|------------------------|---------------------------|---------------------------------|--------------------------------------------|------------------------|---------------------------|---------------------------------|
| Torsion angle                            | Relative Torsion angle | Total energy <sup>a</sup> | Rotational barrier <sup>b</sup> | Torsion angle                              | Relative Torsion angle | Total energy <sup>a</sup> | Rotational barrier <sup>b</sup> |
| -132.41                                  | 0.0                    | -307.583978803            | 0.00                            | 126.80                                     | 0.0                    | -307.585910337            | 0.00                            |
| -117.41                                  | 15.0                   | -307.583864469            | 0.071                           | 141.80                                     | 15.0                   | -307.585682980            | 0.14                            |
| -102.41                                  | 30.0                   | -307.583353472            | 0.39                            | 156.80                                     | 30.0                   | -307.585254177            | 0.41                            |
| -87.41                                   | 45.0                   | -307.582425010            | 0.97                            | 171.80                                     | 45.0                   | -307.584817442            | 0.68                            |
| -72.41                                   | 60.0                   | -307.581117828            | 1.79                            | 186.80                                     | 60.0                   | -307.584522806            | 0.87                            |
| -57.41                                   | 75.0                   | -307.579553814            | 2.77                            | 201.80                                     | 75.0                   | -307.584457096            | 0.91                            |
| -42.41                                   | 90.0                   | -307.577953302            | 3.78                            | 216.80                                     | 90.0                   | -307.584634387            | 0.80                            |
| -27.41                                   | 105.0                  | -307.576642218            | 4.60                            | 231.80                                     | 105.0                  | -307.584991530            | 0.57                            |
| -12.41                                   | 120.0                  | -307.575989646            | 5.01                            | 246.80                                     | 120.0                  | -307.585379919            | 0.33                            |
| 2.59                                     | 135.0                  | -307.576240006            | 4.85                            | 261.80                                     | 135.0                  | -307.585580400            | 0.20                            |
| 17.59                                    | 150.0                  | -307.577386593            | 4.13                            | 276.80                                     | 150.0                  | -307.585363069            | 0.34                            |
| 32.59                                    | 165.0                  | -307.579113162            | 3.05                            | 291.80                                     | 165.0                  | -307.584549648            | 0.85                            |
| 47.59                                    | 180.0                  | -307.580926193            | 1.91                            | 306.80                                     | 180.0                  | -307.583066905            | 1.78                            |
| 62.59                                    | 195.0                  | -307.582380338            | 1.00                            | 321.80                                     | 195.0                  | -307.581027768            | 3.06                            |
| 77.59                                    | 210.0                  | -307.583239807            | 0.46                            | 336.80                                     | 210.0                  | -307.578803580            | 4.46                            |
| 92.59                                    | 225.0                  | -307.583487164            | 0.30                            | 351.80                                     | 225.0                  | -307.576935987            | 5.63                            |
| 107.59                                   | 240.0                  | -307.583279355            | 0.43                            | 366.80                                     | 240.0                  | -307.575959133            | 6.24                            |
| 122.59                                   | 255.0                  | -307.582869953            | 0.69                            | 381.80                                     | 255.0                  | -307.576159808            | 6.11                            |
| 137.59                                   | 270.0                  | -307.582495523            | 0.93                            | 396.80                                     | 270.0                  | -307.577543760            | 5.25                            |
| 152.59                                   | 285.0                  | -307.582338562            | 1.03                            | 411.80                                     | 285.0                  | -307.579638178            | 3.93                            |
| 167.59                                   | 300.0                  | -307.582474046            | 0.94                            | 426.80                                     | 300.0                  | -307.581892982            | 2.52                            |
| 182.59                                   | 315.0                  | -307.582851373            | 0.70                            | 441.80                                     | 315.0                  | -307.583801053            | 1.32                            |
| 197.59                                   | 330.0                  | -307.583338755            | 0.40                            | 456.80                                     | 330.0                  | -307.585094607            | 0.51                            |
| 212.59                                   | 345.0                  | -307.583766418            | 0.13                            | 471.80                                     | 345.0                  | -307.585764308            | 0.09                            |
| 227.59                                   | 360.0                  | -307.583978809            | 0.00                            | 486.80                                     | 360.0                  | -307.585910341            | 0.00                            |

<sup>a</sup>Electronic energies at 0 K. ZPVE and Thermal correction to 298 K are not included. Unit are in hartree. <sup>b</sup>Rotational barriers are calculated as the difference between the total energy of each conformer and that of the most stable conformer. Units in kcal/mole.

**SM 3: Total Energy and Internal Rotation Barriers about C—C Bond.**

| <i>trans</i> - CH <sub>3</sub> —CH=CHOOH |                           |                                 | <i>cis</i> - CH <sub>3</sub> —CH=CHOOH |                           |                                 |
|------------------------------------------|---------------------------|---------------------------------|----------------------------------------|---------------------------|---------------------------------|
| Torsion Angle                            | Total energy <sup>a</sup> | Rotational barrier <sup>b</sup> | Torsion angle                          | Total energy <sup>a</sup> | Rotational barrier <sup>b</sup> |
| 0.0                                      | -268.261740667            | 0.00                            | 0.0                                    | -268.259500864            | 1.31                            |
| 15.0                                     | -268.261064645            | 0.431                           | 15.0                                   | -268.260133871            | 0.91                            |
| 30.0                                     | -268.259862381            | 1.18                            | 30.0                                   | -268.261000558            | 0.37                            |
| 45.0                                     | -268.258750742            | 1.88                            | 45.0                                   | -268.261589159            | 0.00                            |
| 60.0                                     | -268.258503487            | 2.03                            | 60.0                                   | -268.261542707            | 0.03                            |
| 75.0                                     | -268.259352690            | 1.50                            | 75.0                                   | -268.260882311            | 0.44                            |
| 90.0                                     | -268.260635316            | 0.70                            | 90.0                                   | -268.260013734            | 0.98                            |
| 105.0                                    | -268.261571014            | 0.11                            | 105.0                                  | -268.259464027            | 1.33                            |
| 120.0                                    | -268.261751612            | 0.00                            | 120.0                                  | -268.259497489            | 1.31                            |
| 135.0                                    | -268.261116104            | 0.39                            | 135.0                                  | -268.260092158            | 0.94                            |
| 150.0                                    | -268.259921525            | 1.14                            | 150.0                                  | -268.260940221            | 0.40                            |
| 165.0                                    | -268.258769125            | 1.87                            | 165.0                                  | -268.261563186            | 0.01                            |
| 180.0                                    | -268.258506501            | 2.03                            | 180.0                                  | -268.261568090            | 0.01                            |
| 195.0                                    | -268.259395176            | 1.48                            | 195.0                                  | -268.260925719            | 0.41                            |
| 210.0                                    | -268.260701076            | 0.66                            | 210.0                                  | -268.260034731            | 0.97                            |
| 225.0                                    | -268.261610990            | 0.08                            | 225.0                                  | -268.259462878            | 1.33                            |
| 240.0                                    | -268.261729976            | 0.01                            | 240.0                                  | -268.259510106            | 1.30                            |
| 255.0                                    | -268.261033498            | 0.45                            | 255.0                                  | -268.260131200            | 0.91                            |
| 270.0                                    | -268.259823750            | 1.21                            | 270.0                                  | -268.260969522            | 0.38                            |
| 285.0                                    | -268.258722742            | 1.90                            | 285.0                                  | -268.261565585            | 0.01                            |
| 300.0                                    | -268.258516461            | 2.03                            | 300.0                                  | -268.261578241            | 0.00                            |
| 315.0                                    | -268.259384736            | 1.48                            | 315.0                                  | -268.260973806            | 0.38                            |
| 330.0                                    | -268.260661138            | 0.68                            | 330.0                                  | -268.260084556            | 0.94                            |
| 345.0                                    | -268.261588341            | 0.10                            | 345.0                                  | -268.259475560            | 1.32                            |
| 360.0                                    | -268.261740281            | 0.00                            | 360.0                                  | -268.259500993            | 1.31                            |

<sup>a</sup>Electronic energies at 0 K. ZPVE and Thermal correction to 298 K are not included. Unit are in hartree. <sup>b</sup>Rotational barriers are calculated as the difference between the total energy of each conformer and that of the most stable conformer. Units in kcal/mole.

**SM 3 (cont): Total Energy and Internal Rotation Barriers about C—C Bond**

| (CH <sub>3</sub> )CH <sub>3</sub> —C=CHOOH |                           |                           | CH <sub>3</sub> —CH=C(CH <sub>3</sub> )OOH |                        |                           |                           | CH <sub>3</sub> CH=C(—CH <sub>3</sub> )OOH |                        |                           |                           |
|--------------------------------------------|---------------------------|---------------------------|--------------------------------------------|------------------------|---------------------------|---------------------------|--------------------------------------------|------------------------|---------------------------|---------------------------|
| Torsion angle                              | Total energy <sup>a</sup> | Rot. barrier <sup>b</sup> | Torsion angle                              | Relative Torsion angle | Total energy <sup>a</sup> | Rot. barrier <sup>b</sup> | Torsion angle                              | Relative Torsion angle | Total energy <sup>a</sup> | Rot. barrier <sup>b</sup> |
| 0.0                                        | -307.583985298            | 0.00                      | 110.91                                     | 0.0                    | -307.585916345            | 0.00                      | 0.54630                                    | 0.0000                 | -307.585916230            | 0.00                      |
| 15.0                                       | -307.583556131            | 0.27                      | 125.91                                     | 15.0                   | -307.585617002            | 0.18                      | 15.546                                     | 15.000                 | -307.585576769            | 0.21                      |
| 30.0                                       | -307.582560857            | 0.89                      | 140.91                                     | 30.0                   | -307.584814330            | 0.69                      | 30.546                                     | 30.000                 | -307.584562319            | 0.85                      |
| 45.0                                       | -307.581548206            | 1.53                      | 155.91                                     | 45.0                   | -307.583901580            | 1.26                      | 45.546                                     | 45.000                 | -307.583286368            | 1.65                      |
| 60.0                                       | -307.581073176            | 1.82                      | 170.91                                     | 60.0                   | -307.583528637            | 1.49                      | 60.546                                     | 60.000                 | -307.582694654            | 2.02                      |
| 75.0                                       | -307.581454349            | 1.58                      | 185.91                                     | 75.0                   | -307.584002903            | 1.20                      | 75.546                                     | 75.000                 | -307.583353433            | 1.60                      |
| 90.0                                       | -307.582482456            | 0.94                      | 200.91                                     | 90.0                   | -307.584906451            | 0.63                      | 90.546                                     | 90.000                 | -307.584553234            | 0.85                      |
| 105.0                                      | -307.583520923            | 0.29                      | 215.91                                     | 105.0                  | -307.585672071            | 0.15                      | 105.55                                     | 105.00                 | -307.585525030            | 0.24                      |
| 120.0                                      | -307.583983300            | 0.00                      | 230.91                                     | 120.0                  | -307.585911862            | 0.00                      | 120.55                                     | 120.00                 | -307.585915324            | 0.00                      |
| 135.0                                      | -307.583625657            | 0.22                      | 245.91                                     | 135.0                  | -307.585543267            | 0.23                      | 135.55                                     | 135.00                 | -307.585590531            | 0.20                      |
| 150.0                                      | -307.582650879            | 0.83                      | 260.91                                     | 150.0                  | -307.584709635            | 0.75                      | 150.55                                     | 150.00                 | -307.584576546            | 0.84                      |
| 165.0                                      | -307.581583507            | 1.50                      | 275.91                                     | 165.0                  | -307.583847964            | 1.29                      | 165.55                                     | 165.00                 | -307.583296562            | 1.64                      |
| 180.0                                      | -307.581072058            | 1.82                      | 290.91                                     | 180.0                  | -307.583529880            | 1.49                      | 180.55                                     | 180.00                 | -307.582693818            | 2.02                      |
| 195.0                                      | -307.581525138            | 1.54                      | 305.91                                     | 195.0                  | -307.583973724            | 1.22                      | 195.55                                     | 195.00                 | -307.583354628            | 1.60                      |
| 210.0                                      | -307.582634161            | 0.84                      | 320.91                                     | 210.0                  | -307.584839451            | 0.67                      | 210.55                                     | 210.00                 | -307.584591150            | 0.83                      |
| 225.0                                      | -307.583634916            | 0.22                      | 335.91                                     | 225.0                  | -307.585624886            | 0.18                      | 225.55                                     | 225.00                 | -307.585563464            | 0.22                      |
| 240.0                                      | -307.583983867            | 0.00                      | 350.91                                     | 240.0                  | -307.585915577            | 0.00                      | 240.55                                     | 240.00                 | -307.585915989            | 0.00                      |
| 255.0                                      | -307.583559375            | 0.26                      | 365.91                                     | 255.0                  | -307.585566206            | 0.22                      | 255.55                                     | 255.00                 | -307.585560244            | 0.22                      |
| 270.0                                      | -307.582604818            | 0.86                      | 380.91                                     | 270.0                  | -307.584713154            | 0.75                      | 270.55                                     | 270.00                 | -307.584544723            | 0.86                      |
| 285.0                                      | -307.581591008            | 1.50                      | 395.91                                     | 285.0                  | -307.583836235            | 1.30                      | 285.55                                     | 285.00                 | -307.583273705            | 1.65                      |
| 300.0                                      | -307.581076268            | 1.82                      | 410.91                                     | 300.0                  | -307.583532796            | 1.49                      | 300.55                                     | 300.00                 | -307.582696047            | 2.02                      |
| 315.0                                      | -307.581443494            | 1.59                      | 425.91                                     | 315.0                  | -307.584006573            | 1.19                      | 315.55                                     | 315.00                 | -307.583384034            | 1.59                      |
| 330.0                                      | -307.582500378            | 0.93                      | 440.91                                     | 330.0                  | -307.584872164            | 0.65                      | 330.55                                     | 330.00                 | -307.584595350            | 0.82                      |
| 345.0                                      | -307.583564150            | 0.26                      | 455.91                                     | 345.0                  | -307.585629033            | 0.18                      | 345.55                                     | 345.00                 | -307.585551826            | 0.22                      |
| 360.0                                      | -307.583985288            | 0.00                      | 470.91                                     | 360.0                  | -307.585916349            | 0.00                      | 360.55                                     | 360.00                 | -307.585916188            | 0.00                      |

<sup>a</sup>Electronic energies at 0 K. ZPVE and Thermal correction to 298 K are not included. Unit are in hartree. <sup>b</sup>Rotational barriers are calculated as the difference between the total energy of each conformer and that of the most stable conformer. Units in kcal/mole.

**SM 4: Coefficient of Truncated Fourier Series. Representation Expansions for Internal Rotation Potentials<sup>a</sup> (O—O bond)**

| Species                                   | a <sub>0</sub> | a <sub>1</sub> | a <sub>2</sub> | a <sub>3</sub> | a <sub>4</sub> | a <sub>5</sub> | a <sub>6</sub> | a <sub>7</sub> |
|-------------------------------------------|----------------|----------------|----------------|----------------|----------------|----------------|----------------|----------------|
| <i>tr</i> -CH <sub>3</sub> CH=CHOOH       | 1,8035         | 2,2251         | 1,2699         | 0,1962         | 0,0304         | 5,1478e-3      | 2,3703e-4      | 2,9853e-4      |
| <i>cis</i> -CH <sub>3</sub> CH=CHOOH      | 1,7967         | 2,1568         | 1,2316         | 0,1838         | 0,0273         | 5,8548e-3      | 1,0835e-3      | -3,2548e-4     |
| (CH <sub>3</sub> ) <sub>2</sub> C=CHOOH   | 1,6845         | -0,6992        | -1,0948        | 0,1327         | -0,0275        | 3,9528e-3      | 7,9453e-5      | 1,5288e-4      |
| CH <sub>3</sub> CH=C(CH <sub>3</sub> )OOH | 1,9614         | -1,1234        | -1,0657        | 0,2342         | -1,1273e-3     | -4,0065e-3     | -2,0422e-3     | 1,0305e-3      |
|                                           | b <sub>1</sub> | b <sub>2</sub> | b <sub>3</sub> | b <sub>4</sub> | b <sub>5</sub> | b <sub>6</sub> | b <sub>7</sub> |                |
| <i>tr</i> -CH <sub>3</sub> CH=CHOOH       | -0,3988        | -0,6125        | 0,0216         | 4,4268e-3      | 5,4217e-3      | 6,2500e-4      | 4,4489e-4      |                |
| <i>cis</i> -CH <sub>3</sub> CH=CHOOH      | -0,3300        | -0,5974        | 0,0238         | 2,7980e-3      | 4,5803e-3      | 8,0000e-4      | 1,8159e-5      |                |
| (CH <sub>3</sub> ) <sub>2</sub> C=CHOOH   | 1,5636         | -1,0691        | 0,1355         | 6,5021e-3      | -3,0603e-3     | 6,6050e-4      | -3,3129e-4     |                |
| CH <sub>3</sub> CH=C(CH <sub>3</sub> )OOH | -2,1855        | 1,1954         | 0,0397         | -0,0363        | -2,0529e-3     | -6,1808e-4     | -5,8256e-4     |                |

<sup>a</sup> Units in kcal/mole. Values of rotation barriers calculated at B3LYP/6-31G(d,p) level for CH<sub>2</sub>=CH—OOH and CH<sub>3</sub>C≡C—OOH and B3LYP/3-2G for Phenyl—OOH are used to calculate the coefficients.

**SM 5: Coefficient of Truncated Fourier Series. Representation Expansions for Internal Rotation Potentials<sup>a</sup> (C—O bond)**

| Species                                   | a <sub>0</sub> | a <sub>1</sub> | a <sub>2</sub> | a <sub>3</sub> | a <sub>4</sub> | a <sub>5</sub> | a <sub>6</sub> | a <sub>7</sub> |
|-------------------------------------------|----------------|----------------|----------------|----------------|----------------|----------------|----------------|----------------|
| <i>tr</i> -CH <sub>3</sub> CH=CHOOH       | 1,8549         | 0,5729         | -1,4136        | -1,2055        | 0,1689         | -3,4367e-3     | 0,0356         | -0,0147        |
| <i>cis</i> -CH <sub>3</sub> CH=CHOOH      | 2,0929         | 1,6704         | -0,6010        | -0,6272        | 0,2566         | -0,1349        | -0,0350        | 0,0167         |
| (CH <sub>3</sub> ) <sub>2</sub> C=CHOOH   | 2,2854         | -1,4359        | 0,1291         | -0,4331        | -0,1689        | -0,1122        | -0,0140        | -0,0320        |
| CH <sub>3</sub> CH=C(CH <sub>3</sub> )OOH | 2,0564         | -1,4197        | 0,2864         | 0,9244         | 0,2719         | -0,0373        | -0,0171        | 0,0391         |
|                                           | b <sub>1</sub> | b <sub>2</sub> | b <sub>3</sub> | b <sub>4</sub> | b <sub>5</sub> | b <sub>6</sub> | b <sub>7</sub> |                |
| <i>tr</i> -CH <sub>3</sub> CH=CHOOH       | 0,0813         | -0,1152        | -0,1375        | -0,0197        | 0,0325         | 0,0246         | -0,0133        |                |
| <i>cis</i> -CH <sub>3</sub> CH=CHOOH      | -0,1880        | 0,1173         | 0,0959         | -0,0695        | -0,0552        | 0,0279         | 0,0428         |                |
| (CH <sub>3</sub> ) <sub>2</sub> C=CHOOH   | 1,4847         | -0,5534        | -0,4751        | -0,0592        | -6,8831e-3     | -0,0329        | -0,0527        |                |
| CH <sub>3</sub> CH=C(CH <sub>3</sub> )OOH | 0,1472         | 0,0125         | -0,0523        | -9,7709e-3     | 0,0315         | -0,0224        | -3,7448e-3     |                |

<sup>a</sup>Units in kcal/mole. Values of rotation barriers calculated at B3LYP/6-31G(d,p) level for CH<sub>2</sub>=CH—OOH and CH<sub>3</sub>C≡C—OOH and B3LYP/3-2G for Phenyl—OOH are used to calculate the coefficients.

**SM 6: Coefficient of Truncated Fourier Series. Representation Expansions for Internal Rotation Potentials<sup>a</sup> (C—C bond)**

| Species                                    | a <sub>0</sub> | a <sub>1</sub> | a <sub>2</sub> | a <sub>3</sub> | a <sub>4</sub> | a <sub>5</sub> | a <sub>6</sub> | a <sub>7</sub> |
|--------------------------------------------|----------------|----------------|----------------|----------------|----------------|----------------|----------------|----------------|
| <i>tr</i> -CH <sub>3</sub> CH=CHOOH        | 0,9758         | 8,5308e-3      | -0,0121        | -1,0104        | 0,0120         | -6,6120e-3     | -3,0978e-3     | 0,0446         |
| <i>cis</i> -CH <sub>3</sub> CH=CHOOH       | -5,9385e-4     | -8,9110e-3     | -5,3227e-3     | 4,6256e-3      | 0,0115         | 0,6704         | 0,6464         | -8,0363e-3     |
| (CH <sub>3</sub> ) <sub>2</sub> C=CHOOH    | 0,9003         | 0,0197         | -9,1270e-3     | -0,9120        | 8,4476e-3      | -0,0187        | 0,0136         | -2,0436e-3     |
| CH <sub>3</sub> —CH=C(CH <sub>3</sub> )OOH | 0,7211         | -0,0129        | 3,7430e-4      | -0,7469        | -5,7656e-5     | 0,0108         | 1,1800e-3      | -9,8473e-3     |
| CH <sub>3</sub> CH=C(—CH <sub>3</sub> )OOH | 0,9258         | -9,7228e-5     | -6,7996e-3     | -1,0019        | 7,1089e-3      | -2,1819e-3     | 0,0828         | 2,2678e-4      |
|                                            | b <sub>1</sub> | b <sub>2</sub> | b <sub>3</sub> | b <sub>4</sub> | b <sub>5</sub> | b <sub>6</sub> | b <sub>7</sub> |                |
| <i>tr</i> -CH <sub>3</sub> CH=CHOOH        | -3,3004e-3     | 4,6459e-3      | 0,2525         | -1,0378e-3     | -2,6876e-4     | -0,0175        | 1,3008e-3      |                |
| <i>cis</i> -CH <sub>3</sub> CH=CHOOH       | 9,2626e-3      | 1,1352e-3      | -0,2891        | -3,1328e-3     | -9,6256e-4     | -9,6583e-4     | -1,3059e-3     |                |
| (CH <sub>3</sub> ) <sub>2</sub> C=CHOOH    | 9,1876e-3      | -3,5135e-3     | -0,0223        | -3,5387e-3     | 7,5624e-3      | 0,0146         | -8,5920e-4     |                |
| CH <sub>3</sub> —CH=C(CH <sub>3</sub> )OOH | 0,0271         | -6,5803e-3     | 0,0420         | -5,6745e-3     | -9,1884e-3     | -0,0104        | 1,9266e-3      |                |
| CH <sub>3</sub> CH=C(—CH <sub>3</sub> )OOH | 1,7110e-3      | 2,2146e-3      | 8,4200e-3      | 2,2385e-3      | -8,2969e-4     | -0,0169        | -2,2404e-3     |                |

<sup>a</sup>Units in kcal/mole. Values of rotation barriers calculated at B3LYP/6-31G(d,p) level for CH<sub>2</sub>=CH—OOH and CH<sub>3</sub>C≡C—OOH and B3LYP/3-2G for Phenyl—OOH are used to calculate the coefficients.

**SM 7: Thermochemical Properties of *cis*-CH<sub>3</sub>CH=CHOOH, *trans*-CH<sub>3</sub>CH=CHOOH, (CH<sub>3</sub>)<sub>2</sub>C=CHOOH and CH<sub>3</sub>CH=C(CH<sub>3</sub>)OOH****1. *cis*-CH<sub>3</sub>CH=CHOOH (ideal Gas)**

| T (K) | Cp (cal/mol/K) |                |                |             | TVR   | IR+TVR | S<br>(cal/mol/K) | [H(T) - H(0K)]<br>(kcal/mol) |
|-------|----------------|----------------|----------------|-------------|-------|--------|------------------|------------------------------|
|       | IR<br>C—C=COOH | IR<br>CC=C—OOH | IR<br>CC=CO—OH | IR<br>Total |       |        |                  |                              |
| 0.1   | 0,00           | 0,00           | 0,00           | 0,00        | 7,95  | 7,95   | 0.00             | 0.00                         |
| 10    | 0,04           | 0,00           | 0,00           | 0,04        | 7,95  | 7,99   | 36.60            | 0.08                         |
| 50    | 0,55           | 2,39           | 1,15           | 4,09        | 8,07  | 12,16  | 49.41            | 0.39                         |
| 100   | 1,59           | 2,58           | 1,69           | 5,86        | 9,27  | 15,13  | 55.30            | 0.82                         |
| 200   | 2,02           | 2,10           | 1,65           | 5,77        | 12,89 | 18,66  | 62.70            | 1.92                         |
| 300   | 1,77           | 2,22           | 1,57           | 5,56        | 17,60 | 23,16  | 68.70            | 3.44                         |
| 400   | 1,54           | 2,39           | 1,55           | 5,48        | 22,52 | 28,00  | 74.35            | 5.45                         |
| 500   | 1,38           | 2,38           | 1,56           | 5,32        | 26,88 | 32,2   | 79.77            | 7.93                         |
| 600   | 1,28           | 2,24           | 1,56           | 5,08        | 30,51 | 35,59  | 84.93            | 10.80                        |
| 700   | 1,21           | 2,03           | 1,55           | 4,79        | 33,55 | 38,34  | 89.80            | 14.01                        |
| 800   | 1,17           | 1,82           | 1,53           | 4,52        | 36,11 | 40,63  | 94.40            | 17.50                        |
| 900   | 1,13           | 1,61           | 1,51           | 4,25        | 38,31 | 42,56  | 98.74            | 21.22                        |
| 1000  | 1,11           | 1,43           | 1,48           | 4,02        | 40,20 | 44,22  | 102.84           | 25.15                        |
| 1100  | 1,09           | 1,27           | 1,45           | 3,81        | 41,84 | 45,65  | 106.72           | 29.25                        |
| 1200  | 1,07           | 1,13           | 1,41           | 3,61        | 43,27 | 46,88  | 110.39           | 33.51                        |
| 1300  | 1,06           | 1,01           | 1,39           | 3,46        | 44,51 | 47,97  | 113.88           | 37.90                        |
| 1400  | 1,05           | 0,90           | 1,36           | 3,31        | 45,60 | 48,91  | 117.20           | 42.41                        |
| 1500  | 1,04           | 0,81           | 1,33           | 3,18        | 46,55 | 49,73  | 120.36           | 47.02                        |
| 2000  | 1,02           | 0,51           | 1,23           | 2,76        | 49,85 | 52,61  | 134.19           | 71.21                        |
| 2500  | 1,00           | 0,34           | 1,16           | 2,5         | 51,69 | 54,19  | 145.49           | 96.64                        |
| 3000  | 0,98           | 0,25           | 1,12           | 2,35        | 52,80 | 55,15  | 155.00           | 122.78                       |
| 3500  | 0,96           | 0,18           | 1,09           | 2,23        | 53,50 | 55,73  | 163.18           | 149.37                       |
| 4000  | 0,92           | 0,14           | 1,07           | 2,13        | 53,98 | 56,11  | 170.35           | 176.25                       |
| 4500  | 0,88           | 0,11           | 1,06           | 2,05        | 54,31 | 56,36  | 176.72           | 203.33                       |
| 5000  | 0,83           | 0,09           | 1,04           | 1,96        | 54,56 | 56,52  | 182.45           | 230.55                       |

**2. *trans*-CH<sub>3</sub>CH=CHOOH (ideal Gas)**

| T (K) | Cp (cal/mol/K) |                |                |             | TVR   | IR+TVR | S<br>(cal/mol/K) | [H(T) - H(0K)]<br>(kcal/mol) |
|-------|----------------|----------------|----------------|-------------|-------|--------|------------------|------------------------------|
|       | IR<br>C—C=COOH | IR<br>CC=C—OOH | IR<br>CC=CO—OH | IR<br>Total |       |        |                  |                              |
| 0.1   | 0,02           | 0,00           | 0,00           | 0,02        | 7,95  | 7,97   | -147             | .001                         |
| 10    | 0,00           | 0,00           | 0,02           | 0,02        | 7,95  | 7,97   | 36.46            | .08                          |
| 50    | 0,27           | 1,54           | 1,08           | 2,89        | 8,16  | 11,05  | 49.28            | .39                          |
| 100   | 1,19           | 2,55           | 1,44           | 5,18        | 9,67  | 14,85  | 55.33            | .84                          |
| 200   | 1,94           | 2,26           | 1,55           | 5,75        | 13,38 | 19,13  | 63.08            | 1.99                         |
| 300   | 1,97           | 2,06           | 1,52           | 5,55        | 17,90 | 23,45  | 69.24            | 3.55                         |
| 400   | 1,81           | 1,98           | 1,52           | 5,31        | 22,68 | 27,99  | 74.95            | 5.58                         |
| 500   | 1,64           | 1,90           | 1,53           | 5,07        | 26,97 | 32,04  | 80.40            | 8.07                         |
| 600   | 1,50           | 1,82           | 1,54           | 4,86        | 30,58 | 35,44  | 85.58            | 10.95                        |
| 700   | 1,40           | 1,73           | 1,54           | 4,67        | 33,60 | 38,27  | 90.47            | 14.16                        |
| 800   | 1,32           | 1,65           | 1,53           | 4,5         | 36,16 | 40,66  | 95.07            | 17.65                        |
| 900   | 1,26           | 1,58           | 1,51           | 4,35        | 38,35 | 42,7   | 99.42            | 21.38                        |
| 1000  | 1,22           | 1,51           | 1,48           | 4,21        | 40,24 | 44,45  | 103.52           | 25.32                        |
| 1100  | 1,18           | 1,45           | 1,45           | 4,08        | 41,88 | 45,96  | 107.40           | 29.42                        |
| 1200  | 1,15           | 1,40           | 1,42           | 3,97        | 43,31 | 47,28  | 111.08           | 33.69                        |
| 1300  | 1,13           | 1,36           | 1,40           | 3,89        | 44,55 | 48,44  | 114.57           | 38.08                        |
| 1400  | 1,11           | 1,32           | 1,37           | 3,8         | 45,64 | 49,44  | 117.89           | 42.59                        |
| 1500  | 1,10           | 1,29           | 1,34           | 3,73        | 46,59 | 50,32  | 121.05           | 47.20                        |
| 2000  | 1,05           | 1,16           | 1,24           | 3,45        | 49,88 | 53,33  | 134.89           | 71.41                        |
| 2500  | 1,03           | 1,08           | 1,17           | 3,28        | 51,71 | 54,99  | 146.20           | 96.85                        |
| 3000  | 1,01           | 0,99           | 1,13           | 3,13        | 52,81 | 55,94  | 155.71           | 123.00                       |
| 3500  | 1,00           | 0,91           | 1,10           | 3,01        | 53,51 | 56,52  | 163.89           | 149.59                       |
| 4000  | 0,97           | 0,83           | 1,08           | 2,88        | 53,99 | 56,87  | 171.06           | 176.48                       |
| 4500  | 0,95           | 0,75           | 1,06           | 2,76        | 54,32 | 57,08  | 177.43           | 203.56                       |
| 5000  | 0,92           | 0,68           | 1,05           | 2,65        | 54,56 | 57,21  | 183.17           | 230.78                       |

3.  $(\text{CH}_3)_2\text{C}=\text{CHOOH}$  (ideal Gas)

| T (K) | Cp (cal/mol/K) |          |         |         |       |       |        | S<br>(cal/mol/K) | [H(T) -H(0K)]<br>(kcal/mol) |
|-------|----------------|----------|---------|---------|-------|-------|--------|------------------|-----------------------------|
|       | IR             | IR       | IR      | IR      | IR    | TVR   | TVR+IR |                  |                             |
|       | C—(C)C=C       | C(—C)C=C | C=C—OOH | C=CO—OH | Total |       |        |                  |                             |
| 0.1   | 0,00           | 0,00     | 0,00    | 0,00    | 0     | 7,95  | 7,95   | -25              | 0.00                        |
| 10    | 0,11           | 0,11     | 0,03    | 0,00    | 0,25  | 7,95  | 8,20   | 36.35            | 0.08                        |
| 50    | 0,37           | 0,37     | 0,92    | 1,80    | 3,46  | 8,16  | 11,62  | 49.18            | 0.39                        |
| 100   | 1,35           | 1,35     | 1,34    | 2,54    | 6,58  | 10,17 | 16,75  | 55.32            | 0.85                        |
| 200   | 2,03           | 2,03     | 2,03    | 2,06    | 8,15  | 15,60 | 23,75  | 63.92            | 2.13                        |
| 300   | 1,95           | 1,95     | 2,19    | 1,78    | 7,87  | 21,63 | 29,50  | 71.24            | 3.99                        |
| 400   | 1,74           | 1,74     | 2,24    | 1,68    | 7,4   | 27,86 | 35,26  | 78.20            | 6.47                        |
| 500   | 1,56           | 1,56     | 2,23    | 1,63    | 6,98  | 33,47 | 40,45  | 84.92            | 9.54                        |
| 600   | 1,43           | 1,43     | 2,16    | 1,60    | 6,62  | 38,23 | 44,85  | 91.36            | 13.13                       |
| 700   | 1,33           | 1,33     | 2,06    | 1,57    | 6,29  | 42,25 | 48,54  | 97.49            | 17.16                       |
| 800   | 1,26           | 1,267    | 1,96    | 1,53    | 6,01  | 45,67 | 51,68  | 103.29           | 21.56                       |
| 900   | 1,21           | 1,21     | 1,86    | 1,49    | 5,77  | 48,60 | 54,37  | 108.78           | 26.28                       |
| 1000  | 1,17           | 1,17     | 1,76    | 1,45    | 5,55  | 51,14 | 56,69  | 113.99           | 31.27                       |
| 1100  | 1,15           | 1,15     | 1,67    | 1,42    | 5,39  | 53,33 | 58,72  | 118.92           | 36.50                       |
| 1200  | 1,12           | 1,12     | 1,60    | 1,38    | 5,22  | 55,24 | 60,46  | 123.61           | 41.93                       |
| 1300  | 1,10           | 1,10     | 1,53    | 1,35    | 5,08  | 56,90 | 61,98  | 128.06           | 47.54                       |
| 1400  | 1,09           | 1,09     | 1,48    | 1,32    | 4,98  | 58,35 | 63,33  | 132.30           | 53.30                       |
| 1500  | 1,08           | 1,08     | 1,43    | 1,29    | 4,88  | 59,61 | 64,49  | 136.35           | 59.20                       |
| 2000  | 1,04           | 1,04     | 1,26    | 1,19    | 4,53  | 63,97 | 68,50  | 154.07           | 90.21                       |
| 2500  | 1,02           | 1,02     | 1,17    | 1,12    | 4,33  | 66,39 | 70,72  | 168.58           | 122.86                      |
| 3000  | 1,00           | 1,0      | 1,11    | 1,05    | 4,16  | 67,83 | 71,99  | 180.79           | 156.45                      |
| 3500  | 0,98           | 0,98     | 1,07    | 0,98    | 4,01  | 68,76 | 72,77  | 191.31           | 190.61                      |
| 4000  | 0,94           | 0,94     | 1,03    | 0,92    | 3,83  | 69,38 | 73,21  | 200.52           | 225.16                      |
| 4500  | 0,91           | 0,91     | 0,98    | 0,85    | 3,65  | 69,81 | 73,46  | 208.71           | 259.96                      |
| 5000  | 0,87           | 0,87     | 0,94    | 0,78    | 3,46  | 70,13 | 73,59  | 216.07           | 294.95                      |

4.  $\text{CH}_3\text{CH}=\text{C}(\text{CH}_3)\text{OOH}$  (ideal Gas)

| T (K) | Cp (cal/mol/K) |          |           |          |          |       |        | S<br>(cal/mol/K) | [H(T) -H(0K)]<br>(kcal/mol) |
|-------|----------------|----------|-----------|----------|----------|-------|--------|------------------|-----------------------------|
|       | IR             | IR       | IR        | IR       | IR Total | TVR   | TVR+IR |                  |                             |
|       | C—C=C          | C(C)—OOH | C(C)O—O H | C(—C)OOH |          |       |        |                  |                             |
| 0.1   | 0,00           | 0,00     | 0,00      | 0,00     | 0        | 7,95  | 7,95   | -0.34            | 0.00                        |
| 10    | 0,03           | 0,00     | 0,00      | 0,01     | 0,04     | 7,95  | 7,99   | 36.26            | 0.08                        |
| 50    | 1,06           | 1,00     | 1,14      | 0,23     | 3,43     | 8,14  | 11,57  | 49.08            | 0.40                        |
| 100   | 1,85           | 1,40     | 1,56      | 1,11     | 5,92     | 10,25 | 16,17  | 55.25            | 0.85                        |
| 200   | 2,09           | 2,04     | 1,59      | 1,84     | 7,56     | 15,57 | 23,13  | 63.86            | 2.14                        |
| 300   | 1,83           | 2,43     | 1,52      | 1,87     | 7,65     | 21,65 | 29,3   | 71.18            | 3.99                        |
| 400   | 1,58           | 2,56     | 1,49      | 1,72     | 7,35     | 27,93 | 35,28  | 78.15            | 6.47                        |
| 500   | 1,42           | 2,47     | 1,50      | 1,57     | 6,96     | 33,55 | 40,51  | 84.89            | 9.56                        |
| 600   | 1,31           | 2,30     | 1,51      | 1,45     | 6,57     | 38,31 | 44,88  | 91.34            | 13.16                       |
| 700   | 1,24           | 2,11     | 1,51      | 1,36     | 6,22     | 42,31 | 48,53  | 97.47            | 17.19                       |
| 800   | 1,18           | 1,94     | 1,51      | 1,29     | 5,92     | 45,71 | 51,63  | 103.28           | 21.60                       |
| 900   | 1,15           | 1,79     | 1,50      | 1,24     | 5,68     | 48,63 | 54,31  | 108.78           | 26.32                       |
| 1000  | 1,12           | 1,67     | 1,48      | 1,19     | 5,46     | 51,15 | 56,61  | 113.99           | 31.31                       |
| 1100  | 1,09           | 1,58     | 1,46      | 1,16     | 5,29     | 53,34 | 58,63  | 118.93           | 36.54                       |
| 1200  | 1,07           | 1,49     | 1,44      | 1,14     | 5,14     | 55,24 | 60,38  | 123.61           | 41.97                       |
| 1300  | 1,06           | 1,43     | 1,41      | 1,12     | 5,02     | 56,90 | 61,92  | 128.07           | 47.58                       |
| 1400  | 1,04           | 1,37     | 1,39      | 1,10     | 4,9      | 58,34 | 63,24  | 132.31           | 53.34                       |
| 1500  | 1,02           | 1,33     | 1,37      | 1,09     | 4,81     | 59,60 | 64,41  | 136.35           | 59.24                       |
| 2000  | 0,93           | 1,19     | 1,27      | 1,05     | 4,44     | 63,96 | 68,4   | 154.07           | 90.25                       |
| 2500  | 0,82           | 1,11     | 1,20      | 1,03     | 4,16     | 66,38 | 70,54  | 168.58           | 122.89                      |
| 3000  | 0,71           | 1,07     | 1,15      | 1,02     | 3,95     | 67,83 | 71,78  | 180.79           | 156.47                      |
| 3500  | 0,62           | 1,03     | 1,11      | 1,01     | 3,77     | 68,75 | 72,52  | 191.30           | 190.63                      |
| 4000  | 0,53           | 0,99     | 1,09      | 1,00     | 3,61     | 69,37 | 72,98  | 200.51           | 225.17                      |
| 4500  | 0,46           | 0,95     | 1,07      | 0,99     | 3,47     | 69,81 | 73,28  | 208.70           | 259.97                      |
| 5000  | 0,40           | 0,91     | 1,06      | 0,97     | 3,34     | 70,13 | 73,47  | 216.07           | 294.96                      |
